# Supplementary material
Source: publisher figshare collection journal article supplement (https://diabetesjournals.figshare.com/ndownloader/files/27702210)

**Figure 2S Kaplan-Meier survival curves comparing the proportion of clinical resolution between the control group and intervention group (p=0.61); (Online-Only Supplemental Material Supplemental); black line=control; dashed line=intervention**

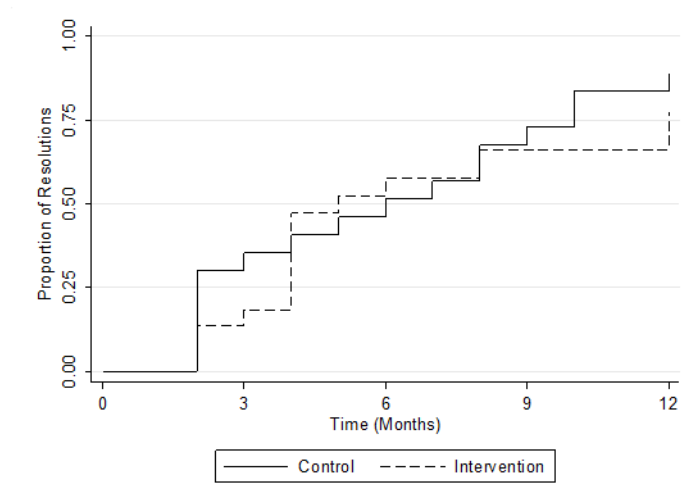

Supplement: Supplementary file 1 [file 27702210]
